# Supplementary material
Source: Springer Nature journal article supplement (https://www.springermedizin.de/resource/supplementary/12890_2012_420_MOESM1_ESM.pdf/9505168)
Supplement: MOESM1 [file 9505168]

Day 0 - heart failure patients included

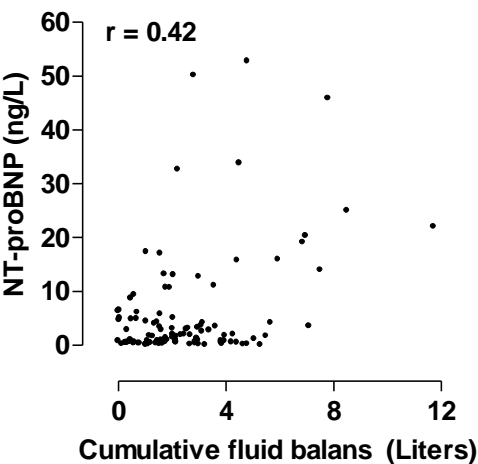

Day 2

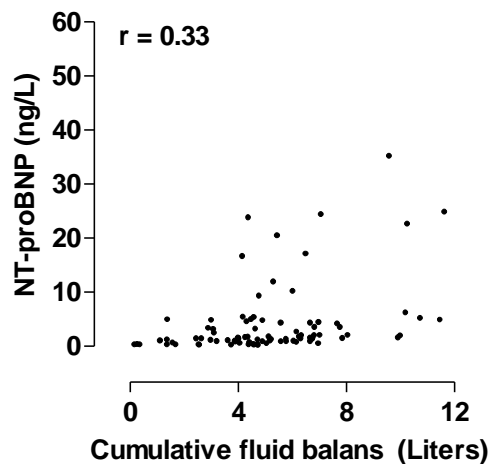

Day 4

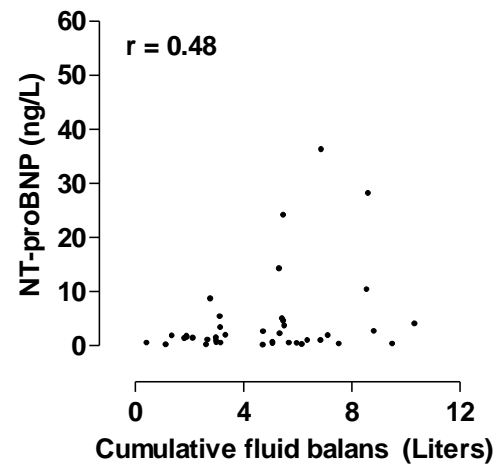

Day 0 - heart failure patients excluded

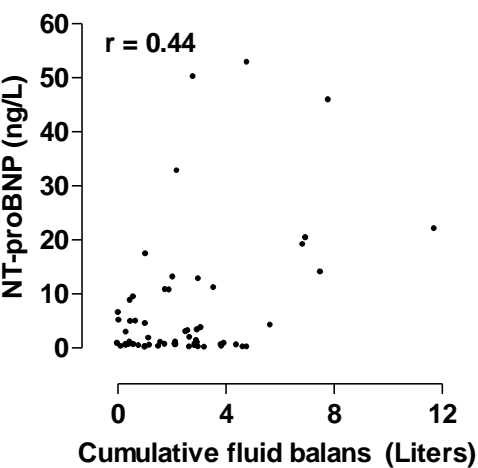

Day 2

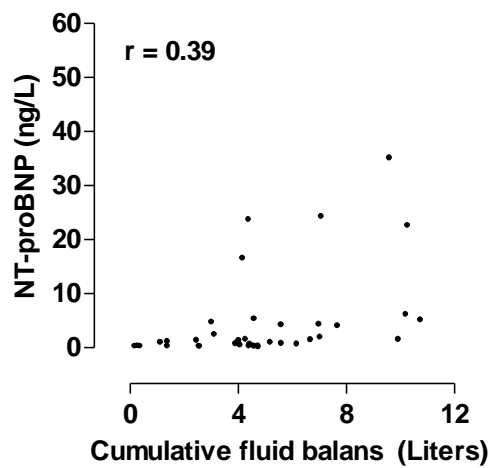

Day 4

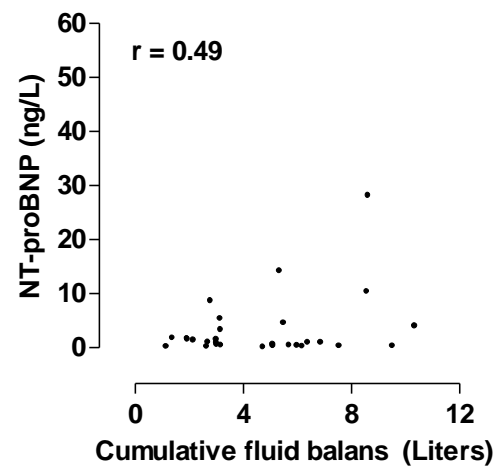

**Figure 1.** Upper panels: serum levels of NT-proBNP in a scatterplot with cumulative fluid balance on day 0 to 4; all correlations ( $r$ ) were significant on all days. Lower panels: serum levels of NT-proBNP in patients without heart failure. All correlations were significant on all days.
